# Supplementary material for: Hydrogenation of 3-hydroxypropanal to 1,3-propanediol over a Cu–V/Ni/SiO2catalyst
Source: Royal Society of Chemistry journal article supplement (doi:10.1039/c7nj01746d), 2017-01-01
Supplement: c7nj01746d1.pdf [file c7nj01746d1.pdf]

**Hydrogenation of 3-Hydroxypropanal to 1,3-Propanediol over Cu-V/Ni/SiO<sub>2</sub>  
Catalyst**

Li-Jun Li<sup>a†</sup>, Wen-Jun Yi<sup>a†</sup>, Tian-Wei Liu<sup>a</sup>, Chen Huang<sup>a</sup>, An Li<sup>a</sup>, Cai-Wu Luo<sup>a</sup>, Zi-Sheng  
Chao<sup>a,b\*</sup>

**New Journal of Chemistry**

**Electronic Supplementary Information**

Fig S1 the element distribution of the Cu-V/Ni/SiO<sub>2</sub>

Table S1 the maximum temperatures and area percentages of each  
deconvoluted peak of various catalysts

Table S2 XPS binding energies for various catalysts

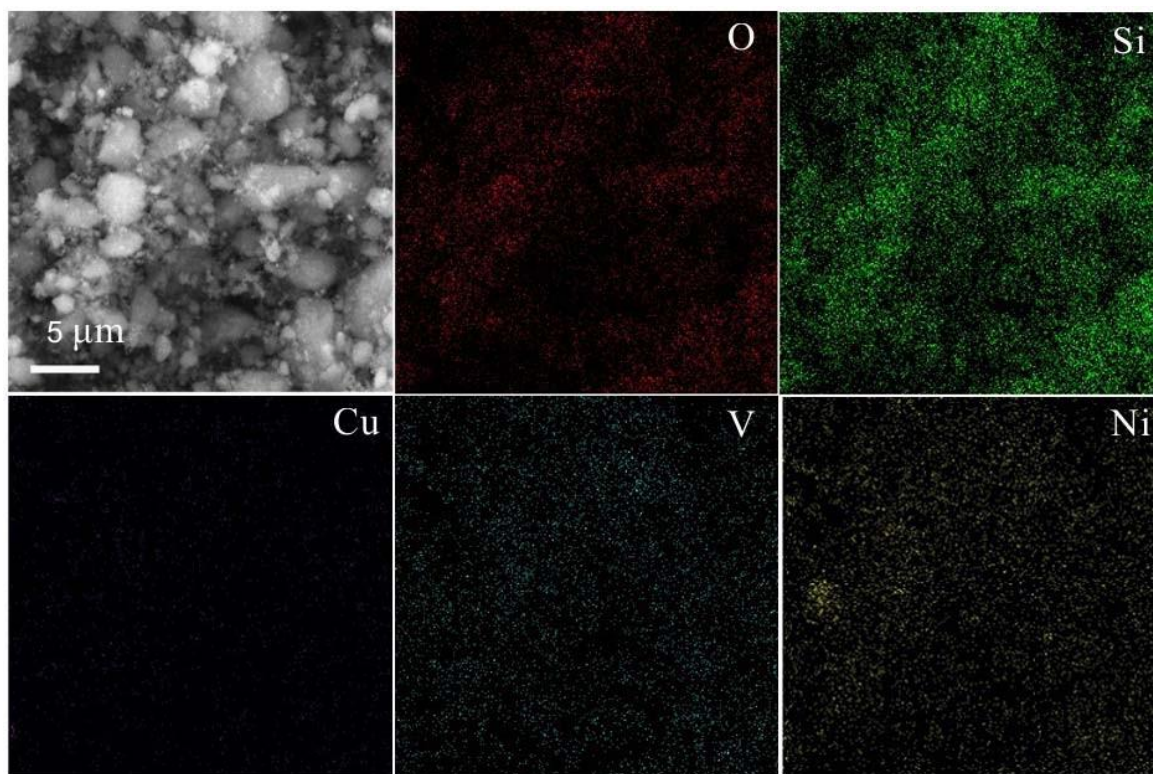

Fig S1 the element distribution of the Cu-V/Ni/SiO<sub>2</sub>

Scanning electron microscopy (SEM) and EDS mapping were carried out over a Philips XL30E-SEM-FEG scanning electron microscope, operated at an accelerating voltage of 20 kV. The powder sample was directly measured.

Table S1 the maximum temperatures and area percentages of each deconvoluted peak of various catalysts

| Catalyst                      | Temperature (°C)          |              |                           |              |                        |                          |              |
|-------------------------------|---------------------------|--------------|---------------------------|--------------|------------------------|--------------------------|--------------|
|                               | Cu particles <sup>a</sup> |              | Ni particles <sup>b</sup> |              |                        | V particles <sup>c</sup> |              |
|                               |                           |              | L-NiO                     | S-NiO        | W-NiO-SiO <sub>2</sub> | S-NiO-SiO <sub>2</sub>   |              |
| 15Ni/SiO <sub>2</sub>         |                           |              |                           | 396.1(65.7%) | 461.1(32.0%)           | 590.2(2.3%)              |              |
| 30Ni/SiO <sub>2</sub>         |                           |              | 300.0(2.3%)               | 381.6(74.6%) | 456.7(23.1%)           |                          |              |
| 5Cu-20V/30Ni/SiO <sub>2</sub> | 241.8(42.4%)              | 273.2(57.6%) |                           | 365.1(18.2%) | 407.7(81.8%)           | 486.2(32.9%)             | 520.4(67.1%) |

<sup>a</sup> The value in parentheses is the percentage composition of the Cu;

<sup>b</sup> The value in parentheses is the percentage composition of the Ni;

<sup>c</sup> The value in parentheses is the percentage composition of the V.

Table S2 XPS binding energies for various catalysts

| Catalyst                      | binding energy (eV)              |              |                                   |              |       |
|-------------------------------|----------------------------------|--------------|-----------------------------------|--------------|-------|
|                               | V 2p <sub>3/2</sub> <sup>a</sup> |              | Ni 2p <sub>3/2</sub> <sup>b</sup> |              | Cu 2p |
| 15Ni/SiO <sub>2</sub>         |                                  |              | 854.0(64.7%)                      | 855.8(35.3%) |       |
| 30Ni/SiO <sub>2</sub>         |                                  |              | 854.0(66.2%)                      | 855.8(33.8%) |       |
| 5Cu-20V/30Ni/SiO <sub>2</sub> | 516.2(86.5%)                     | 517.3(13.5%) | 854.5(59.2%)                      | 856.1(40.8%) | 933.8 |

<sup>a</sup> The value in parentheses is the percentage composition of the V 2p<sub>3/2</sub>;

<sup>b</sup> The value in parentheses is the percentage composition of the Ni 2p<sub>3/2</sub>.
